# Supplementary material for: Is decreasing mortality in total hip and knee arthroplasty patients dependent on patients’ comorbidity? A Danish nationwide, population-based cohort study (1996–2013)
Source: PubMed Central journal article supplement — Acta Orthop. 2017 Jan 12;88(3):288–93. doi: 10.1080/17453674.2017.1279496 (PMC5434597; doi:10.1080/17453674.2017.1279496), 2017-01-12
Supplement: IORT_A_1279496_SM9429.pdf [file IORT_A_1279496_SM9429.pdf]

## Supplementary data

Table 2. Number of cases, absolute mortality risk, and relative risk (RR) of mortality in 4 specific comorbidity groups for the total study period, and stratified according to year of surgery. Adjustments have been made for age and gender

| Comorbidity               | No. of cases | Risk % (95% CI)   | Adjusted RR (95% CI) |
|---------------------------|--------------|-------------------|----------------------|
| <b>THA 1996–2013</b>      |              |                   |                      |
| Diabetes                  | 4,445        | 4.45 (4.32–4.58)  | 1.68 (1.26–2.24)     |
| Cardiovascular disease    | 12,656       | 12.66 (12.6–12.9) | 2.07 (1.71–2.50)     |
| Cancer                    | 5,487        | 8.80 (8.63–8.98)  | 1.16 (0.90–1.48)     |
| Chronic pulmonary disease | 8,799        | 5.49 (5.24–5.63)  | 0.82 (0.58–1.17)     |
| <b>THA 1996–1999</b>      |              |                   |                      |
| Diabetes                  | 357          | 2.38 (2.14–2.64)  | 1.97 (0.86–4.54)     |
| Cardiovascular disease    | 1,407        | 9.38 (8.92–9.86)  | 1.87 (1.16–3.02)     |
| Cancer                    | 942          | 6.28 (5.90–6.68)  | 0.99 (0.48–2.05)     |
| Chronic pulmonary disease | 497          | 3.31 (3.03–3.61)  | 1.22 (0.43–3.48)     |
| <b>THA 2000–2004</b>      |              |                   |                      |
| Diabetes                  | 818          | 3.42 (3.19–3.65)  | 1.47 (0.81–2.68)     |
| Cardiovascular disease    | 2,982        | 12.45 (12.1–12.9) | 2.85 (2.04–3.98)     |
| Cancer                    | 1,856        | 7.75 (7.42–8.10)  | 1.15 (0.71–1.87)     |
| Chronic pulmonary disease | 1,213        | 5.07 (4.79–5.35)  | 0.55 (0.27–1.10)     |
| <b>THA 2005–2009</b>      |              |                   |                      |
| Diabetes                  | 1,564        | 4.87 (4.64–5.11)  | 1.50 (0.86–2.63)     |
| Cardiovascular disease    | 4,249        | 13.23 (12.9–13.6) | 2.13 (1.49–3.03)     |
| Cancer                    | 2,852        | 8.88 (8.57–9.20)  | 1.08 (0.67–1.75)     |
| Chronic pulmonary disease | 1,900        | 5.92 (5.66–6.18)  | 0.77 (0.38–1.56)     |
| <b>THA 2010–2013</b>      |              |                   |                      |
| Diabetes                  | 1,706        | 5.90 (5.63–6.18)  | 2.17 (1.35–3.50)     |
| Cardiovascular disease    | 4,018        | 13.90 (13.5–14.3) | 1.58 (1.07–2.33)     |
| Cancer                    | 3,149        | 10.90 (10.5–11.3) | 1.49 (0.97–2.30)     |
| Chronic pulmonary disease | 1,877        | 6.50 (6.21–6.79)  | 1.06 (0.58–1.95)     |
| <b>TKA 1997–2013</b>      |              |                   |                      |
| Diabetes                  | 4,689        | 7.36 (7.16–7.56)  | 1.81 (1.27–2.58)     |
| Cardiovascular disease    | 8,588        | 13.48 (13.2–13.8) | 1.70 (1.29–2.24)     |
| Cancer                    | 4,025        | 9.51 (9.29–9.74)  | 1.14 (0.80–1.62)     |
| Chronic pulmonary disease | 6,062        | 6.32 (6.13–6.51)  | 0.74 (0.47–1.19)     |
| <b>TKA 1997–1999</b>      |              |                   |                      |
| Diabetes                  | 134          | 3.59 (3.01–4.23)  | 1.57 (0.21–11.8)     |
| Cardiovascular disease    | 346          | 9.26 (8.35–10.2)  | 1.00 (0.23–4.39)     |
| Cancer                    | 253          | 6.77 (5.99–7.62)  | 0.68 (0.09–5.10)     |
| Chronic pulmonary disease | 141          | 3.77 (3.19–4.43)  | –                    |
| <b>TKA 2000–2004</b>      |              |                   |                      |
| Diabetes                  | 682          | 5.60 (5.20–6.02)  | 2.75 (1.33–5.70)     |
| Cardiovascular disease    | 1,574        | 12.93 (12.3–13.5) | 2.41 (1.35–4.30)     |
| Cancer                    | 1,031        | 8.47 (7.98–8.98)  | 0.94 (0.40–2.20)     |
| Chronic pulmonary disease | 636          | 5.22 (4.83–5.63)  | 1.20 (0.40–3.58)     |
| <b>TKA 2005–2009</b>      |              |                   |                      |
| Diabetes                  | 1,831        | 7.35 (7.03–7.68)  | 1.72 (0.99–3.00)     |
| Cardiovascular disease    | 3,452        | 13.85 (13.4–14.3) | 1.31 (0.84–2.04)     |
| Cancer                    | 2,369        | 9.51 (9.15–9.88)  | 1.29 (0.77–2.18)     |
| Chronic pulmonary disease | 1,614        | 6.48 (6.17–6.79)  | 0.33 (0.16–0.74)     |
| <b>TKA 2010–2013</b>      |              |                   |                      |
| Diabetes                  | 2,042        | 8.92 (8.56–9.30)  | 1.68 (0.90–3.15)     |
| Cardiovascular disease    | 3,216        | 14.05 (13.6–14.5) | 2.05 (1.25–3.35)     |
| Cancer                    | 2,409        | 10.53 (10.1–10.9) | 1.18 (0.63–2.19)     |
| Chronic pulmonary disease | 1,634        | 7.14 (6.81–7.48)  | 1.83 (0.74–4.49)     |

Table 3. Number of deaths, absolute mortality risk, and the relative risk (RR) of 90-day mortality after total hip and knee arthroplasty (THA and TKA) according to year of surgery (1996/1997–1999, 2000–2004, 2005–2009, 2010–2013) and stratified according to comorbidity burden, measured with the Charlson comorbidity index. The RR estimates have been adjusted for age and gender and are presented with 95% confidence intervals (CIs)

| CCI group                   | No. of deaths | Mortality risk (95% CI) | Crude RR (95% CI) | Adjusted RR (95% CI) |
|-----------------------------|---------------|-------------------------|-------------------|----------------------|
| <b>THA – All procedures</b> |               |                         |                   |                      |
| 1996–1999                   | 105           | 0.70 (0.52–0.85)        | Reference         | Reference            |
| 2000–2004                   | 159           | 0.66 (0.57–0.78)        | 0.95 (0.74–1.21)  | 0.97 (0.76–1.24)     |
| 2005–2009                   | 152           | 0.47 (0.40–0.55)        | 0.67 (0.52–0.86)  | 0.71 (0.55–0.91)     |
| 2010–2013                   | 131           | 0.45 (0.38–0.54)        | 0.64 (0.49–0.82)  | 0.66 (0.51–0.85)     |
| THA CCI-none                |               |                         |                   |                      |
| 1996–1999                   | 61            | 0.53 (0.41–0.68)        | Reference         | Reference            |
| 2000–2004                   | 67            | 0.39 (0.31–0.50)        | 0.74 (0.53–1.05)  | 0.78 (0.55–1.11)     |
| 2005–2009                   | 68            | 0.31 (0.24–0.39)        | 0.58 (0.41–.082)  | 0.64 (0.45–0.90)     |
| 2010–2013                   | 49            | 0.26 (0.19–0.34)        | 0.47 (0.32–0.69)  | 0.52 (0.35–0.76)     |
| THA CCI-low                 |               |                         |                   |                      |
| 1996–1999                   | 26            | 1.35 (0.89–1.98)        | Reference         | Reference            |
| 2000–2004                   | 36            | 1.00 (0.70–1.38)        | 0.74 (0.45–1.22)  | 0.76 (0.46–1.27)     |
| 2005–2009                   | 32            | 0.65 (0.44–0.92)        | 0.48 (0.28–0.80)  | 0.51 (0.30–0.84)     |
| 2010–2013                   | 30            | 0.66 (0.44–0.93)        | 0.48 (0.29–0.82)  | 0.50 (0.29–0.84)     |
| THA CCI-moderate            |               |                         |                   |                      |
| 1996–1999                   | 12            | 1.04 (0.54–1.82)        | Reference         | Reference            |
| 2000–2004                   | 33            | 1.48 (1.02–2.08)        | 1.42 (0.74–2.76)  | 1.34 (0.69–2.60)     |
| 2005–2009                   | 21            | 0.63 (0.39–0.97)        | 0.61 (0.30–1.23)  | 0.60 (0.30–1.23)     |
| 2010–2013                   | 22            | 0.65 (0.41–0.98)        | 0.62 (0.31–1.25)  | 0.63 (0.31–1.28)     |
| THA CCI-high                |               |                         |                   |                      |
| 1996–1999                   | 6             | 1.42 (0.52–3.05)        | Reference         | Reference            |
| 2000–2004                   | 23            | 2.04 (1.30–3.04)        | 1.45 (0.59–3.55)  | 1.45 (0.59–3.55)     |
| 2005–2009                   | 31            | 1.58 (1.07–2.23)        | 1.12 (0.47–2.68)  | 1.13 (0.47–2.71)     |
| 2010–2013                   | 30            | 1.47 (1.00–2.10)        | 1.04 (0.43–2.50)  | 1.04 (0.43–2.49)     |
| <b>TKA – All procedures</b> |               |                         |                   |                      |
| 1997–1999                   | 20            | 0.54 (0.33–0.83)        | Reference         | Reference            |
| 2000–2004                   | 56            | 0.46 (0.35–0.60)        | 0.84 (0.51–1.41)  | 0.85 (0.51–1.41)     |
| 2005–2009                   | 109           | 0.44 (0.36–0.53)        | 0.81 (0.50–1.30)  | 0.86 (0.53–1.38)     |
| 2010–2013                   | 78            | 0.34 (0.27–0.43)        | 0.62 (0.38–1.01)  | 0.68 (0.41–1.11)     |
| TKA CCI-none                |               |                         |                   |                      |
| 1997–1999                   | 16            | 0.58 (0.33–0.95)        | Reference         | Reference            |
| 2000–2004                   | 24            | 0.30 (0.19–0.44)        | 0.51 (0.27–0.95)  | 0.52 (0.27–0.97)     |
| 2005–2009                   | 41            | 0.26 (0.18–0.35)        | 0.44 (0.25–0.78)  | 0.49 (0.27–0.87)     |
| 2010–2013                   | 37            | 0.26 (0.18–0.36)        | 0.43 (0.24–0.78)  | 0.51 (0.28–0.91)     |
| TKA CCI-low                 |               |                         |                   |                      |
| 1997–1999                   | 3             | 0.56 (0.12–1.62)        | Reference         | Reference            |
| 2000–2004                   | 14            | 0.66 (0.36–1.11)        | 1.10 (0.31–3.87)  | 1.17 (0.33–4.10)     |
| 2005–2009                   | 18            | 0.42 (0.25–0.66)        | 0.74 (0.22–2.53)  | 0.82 (0.24–2.78)     |
| 2010–2013                   | 7             | 0.17 (0.07–0.35)        | 0.30 (0.08–1.17)  | 0.34 (0.09–1.30)     |
| TKA CCI-moderate            |               |                         |                   |                      |
| 1997–1999                   | 1             | 0.30 (0.01–1.68)        | Reference         | Reference            |
| 2000–2004                   | 7             | 0.55 (0.22–1.12)        | 1.81 (0.22–14.7)  | 1.74 (0.21–14.1)     |
| 2005–2009                   | 23            | 0.81 (0.51–1.21)        | 2.68 (0.36–19.8)  | 2.72 (0.37–20.1)     |
| 2010–2013                   | 11            | 0.39 (0.20–0.70)        | 1.18 (0.15–9.20)  | 1.24 (0.17–9.72)     |
| TKA CCI-high                |               |                         |                   |                      |
| 1997–1999                   | 0             | –                       | –                 | –                    |
| 2000–2004                   | 11            | 1.65 (0.83–2.94)        | Reference         | Reference            |
| 2005–2009                   | 27            | 1.53 (1.01–2.22)        | 0.89 (0.44–1.80)  | 0.88 (0.44–1.79)     |
| 2010–2013                   | 23            | 1.29 (0.82–1.93)        | 0.78 (0.38–1.60)  | 0.81 (0.39–1.67)     |

## Appendix 1

Disease categories, with underlying ICD-8 and ICD-10 codes and scores used to calculate the Charlson comorbidity index. The index score was calculated by adding the points for each comorbid condition registered in a 10-year period before the primary procedure. ICD-8 codes were used from 1977 until 1993. ICD-10 codes were used from 1994 and onward

| Disease category                 | ICD-8                                                          | ICD-10                                                                  | Points |
|----------------------------------|----------------------------------------------------------------|-------------------------------------------------------------------------|--------|
| Myocardial infarction            | 410                                                            | I21-I23                                                                 | 1      |
| Congestive heart failure         | 427.09-427.11, 427.19, 428.99, 782.49                          | I50, I11.0, I13.0, I13.2                                                | 1      |
| Peripheral vascular disease      | 440-445                                                        | I70-I74, I77                                                            | 1      |
| Cerebrovascular disease          | 430-438                                                        | I60-I69, G45, G46                                                       | 1      |
| Dementia                         | 290.09-290.19, 293.09                                          | F00-F03, F05.1, G30                                                     | 1      |
| Chronic pulmonary disease        | 490-493, 515-518                                               | J40-J47, J60-J67, J68.4, J70.1, J70.3, J84.1, J92.0, J96.1, J98.2-J98.3 | 1      |
| Connective tissue disease        | 712, 716, 734, 446, 135.99                                     | M05, M06, M08, M09, M30-M36, D86                                        | 1      |
| Peptic ulcer disease             | 530.91, 530.98, 531-534                                        | K22.1, K25-K28                                                          | 1      |
| Mild liver disease               | 571, 573.01, 573.04                                            | B18, K70.0-K70.3, K70.9, K71, K73, K74, K76.0                           | 1      |
| Diabetes I and II                | 249.00, 249.06, 249.07, 249.09, 250.00, 250.06, 250.07, 250.09 | E10.0, E10.1, E10.9, E11.0, E11.1, E11.9                                | 1      |
| Hemiplegia                       | 344                                                            | G81, G82                                                                | 2      |
| Moderate to severe renal disease | 403, 404, 580-584, 590.09, 593.19, 753.10-753.19, 792          | I12, I13, N00-N05, N07, N11, N14, N17-N19, Q61                          | 2      |
| Diabetes with end organ damage   | 249.01-249.05, 249.08, 250.01-250.05, 250.08                   | E10.2-E10.8, E11.2-E11.8                                                | 2      |
| Any tumor                        | 140-194                                                        | C00-C75                                                                 | 2      |
| Leukemia                         | 204-207                                                        | C91-C85                                                                 | 2      |
| Lymphoma                         | 200-203, 275.59                                                | C81-C85, C88, C90, C96                                                  | 2      |
| Moderate to severe liver disease | 070.00, 070.02, 070.04, 070.06, 070.08, 573.00, 456.00-456.09  | B15.0, B16.0, B16.2, B19.0, K70.4, K72, K76.6, I85                      | 3      |
| Metastatic solid tumor           | 195-199                                                        | C76-C80                                                                 | 6      |
| AIDS                             | 079.83                                                         | B21-B24                                                                 | 6      |

## Appendix 2

Number of deaths within 90 days of the primary procedure according to comorbidity burden measured with the Charlson comorbidity index and time period. Mortality risks, and crude and adjusted relative risks (RRs) of dying within 90 days of the primary procedure according to comorbidity burden and stratified according to time period. RRs were adjusted for age and gender

| CCI group            | No. of deaths | Mortality risk (95% CI) | Crude RR (95% CI) | Adjusted RR (95% CI) |
|----------------------|---------------|-------------------------|-------------------|----------------------|
| <b>THA 1996–2013</b> |               |                         |                   |                      |
| none                 | 245           | 0.35 (0.31–0.40)        | reference         | reference            |
| low                  | 124           | 0.83 (0.66–0.98)        | 2.37 (1.91–2.94)  | 1.93 (1.55–2.39)     |
| moderate             | 88            | 0.87 (0.70–1.07)        | 2.50 (1.96–3.19)  | 1.95 (1.52–2.49)     |
| high                 | 90            | 1.62 (1.30–1.99)        | 4.67 (3.66–5.94)  | 3.31 (2.59–4.23)     |
| <b>THA 1996–1999</b> |               |                         |                   |                      |
| none                 | 61            | 0.53 (0.41–0.68)        | reference         | reference            |
| low                  | 26            | 1.36 (0.89–1.98)        | 2.57 (1.62–4.06)  | 2.10 (1.32–3.33)     |
| moderate             | 12            | 1.04 (0.54–1.82)        | 1.98 (1.06–3.67)  | 1.64 (0.88–3.05)     |
| high                 | 6             | 1.42 (0.52–3.05)        | 2.68 (1.16–6.20)  | 2.00 (0.86–4.63)     |
| <b>THA 2000–2004</b> |               |                         |                   |                      |
| none                 | 67            | 0.39 (0.31–0.50)        | reference         | reference            |
| low                  | 36            | 1.00 (0.70–1.38)        | 2.54 (1.70–3.81)  | 2.08 (1.39–3.13)     |
| moderate             | 33            | 1.48 (1.02–2.08)        | 3.78 (2.49–5.74)  | 2.81 (1.85–4.28)     |
| high                 | 22            | 1.95 (1.23–2.94)        | 5.20 (3.24–8.36)  | 3.68 (2.28–5.84)     |
| <b>THA 2005–2009</b> |               |                         |                   |                      |
| none                 | 68            | 0.31 (0.24–0.39)        | reference         | reference            |
| low                  | 32            | 0.65 (0.44–0.92)        | 2.13 (1.40–3.24)  | 1.73 (1.13–2.63)     |
| moderate             | 21            | 0.63 (0.39–0.97)        | 2.07 (1.27–3.39)  | 1.57 (0.96–2.57)     |
| high                 | 31            | 1.58 (1.07–2.23)        | 5.19 (3.39–7.94)  | 3.64 (2.37–5.60)     |
| <b>THA 2010–2013</b> |               |                         |                   |                      |
| none                 | 49            | 0.26 (0.19–0.34)        | reference         | reference            |
| low                  | 30            | 0.66 (0.44–0.93)        | 2.64 (1.67–4.17)  | 2.13 (1.34–3.38)     |
| moderate             | 22            | 0.65 (0.41–0.98)        | 2.60 (1.57–4.32)  | 2.11 (1.27–3.52)     |
| high                 | 30            | 1.47 (1.00–2.10)        | 5.95 (3.76–9.41)  | 4.23 (2.65–6.74)     |
| <b>TKA 1997–2013</b> |               |                         |                   |                      |
| none                 | 118           | 0.29 (0.24–0.34)        | reference         | reference            |
| low                  | 42            | 0.38 (0.27–0.51)        | 1.29 (0.91–1.85)  | 1.13 (0.79–1.62)     |
| moderate             | 42            | 0.58 (0.42–0.78)        | 1.98 (1.39–2.83)  | 1.62 (1.13–2.31)     |
| high                 | 61            | 1.41 (1.08–1.80)        | 4.88 (3.57–6.66)  | 3.74 (2.73–5.12)     |
| <b>TKA 1997–1999</b> |               |                         |                   |                      |
| none                 | 16            | 0.58 (0.33–0.95)        | reference         | reference            |
| low                  | 3             | 0.56 (0.12–1.62)        | 0.95 (0.28–3.27)  | 0.87 (0.25–3.01)     |
| moderate             | 1             | 0.30 (0.01–1.68)        | 0.52 (0.07–3.90)  | 0.47 (0.06–3.53)     |
| high                 | 0             | –                       | –                 | –                    |
| <b>TKA 2000–2004</b> |               |                         |                   |                      |
| none                 | 24            | 0.30 (0.19–0.44)        | reference         | reference            |
| low                  | 14            | 0.66 (0.36–1.11)        | 2.08 (1.06–4.09)  | 1.92 (0.98–3.78)     |
| moderate             | 7             | 0.55 (0.22–1.12)        | 1.85 (0.80–4.30)  | 1.52 (0.65–3.54)     |
| high                 | 11            | 1.65 (0.83–2.94)        | 5.64 (2.76–11.5)  | 4.48 (2.18–9.19)     |
| <b>TKA 2005–2009</b> |               |                         |                   |                      |
| none                 | 41            | 0.26 (0.18–0.35)        | reference         | reference            |
| low                  | 18            | 0.42 (0.25–0.66)        | 1.62 (0.93–2.82)  | 1.38 (0.79–2.41)     |
| moderate             | 23            | 0.81 (0.51–1.21)        | 3.17 (1.90–5.27)  | 2.52 (1.51–4.23)     |
| high                 | 27            | 1.53 (1.01–2.22)        | 5.80 (3.33–9.48)  | 4.20 (2.55–6.91)     |
| <b>TKA 2010–2013</b> |               |                         |                   |                      |
| none                 | 37            | 0.26 (0.18–0.36)        | reference         | reference            |
| low                  | 7             | 0.17 (0.07–0.35)        | 0.67 (0.30–1.50)  | 0.58 (0.26–1.30)     |
| moderate             | 11            | 0.39 (0.20–0.70)        | 1.40 (0.70–2.83)  | 1.14 (0.57–2.32)     |
| high                 | 23            | 1.29 (0.82–1.93)        | 5.11 (3.03–8.62)  | 3.94 (2.32–6.72)     |
